# Supplementary material for: Hypothesizing mechanistic links between microbes and disease using knowledge graphs
Source: Springer Nature journal article supplement (doi:10.1038/s41598-025-91230-6), 2025-02-26
Supplement: MOESM1 [file 41598_2025_91230_MOESM1_ESM.docx]

Supplementary Table 1. A Spearman’s rank-based correlation was performed for the rank determined by average cosine similarity for (A) all shortest paths (directed and undirected) (rs = 0.05, p = 6.4e-1) and (B) template-based paths (rs=-0.08, p=3.7e-1) between *F. prausnitzii* and PD.

A. All Shortest Paths Based Search

| **Path** | **Node2Vec_Rank** | **TransE_Rank** |
| --- | --- | --- |
| Path_0 | 62 | 65 |
| Path_1 | 66 | 39 |
| Path_2 | 80 | 55 |
| Path_3 | 81 | 53 |
| Path_4 | 75 | 57 |
| Path_5 | 79 | 60 |
| Path_6 | 82 | 56 |
| Path_7 | 77 | 59 |
| Path_8 | 83 | 51 |
| Path_9 | 78 | 54 |
| Path_10 | 3 | 67 |
| Path_11 | 8 | 68 |
| Path_12 | 43 | 71 |
| Path_13 | 22 | 75 |
| Path_14 | 25 | 72 |
| Path_15 | 31 | 81 |
| Path_16 | 56 | 74 |
| Path_17 | 39 | 80 |
| Path_18 | 30 | 83 |
| Path_19 | 57 | 76 |
| Path_20 | 16 | 66 |
| Path_21 | 38 | 77 |
| Path_22 | 48 | 73 |
| Path_23 | 53 | 78 |
| Path_24 | 11 | 82 |
| Path_25 | 6 | 49 |
| Path_26 | 73 | 70 |
| Path_27 | 54 | 44 |
| Path_28 | 36 | 5 |
| Path_29 | 20 | 18 |
| Path_30 | 47 | 10 |
| Path_31 | 10 | 64 |
| Path_32 | 74 | 7 |
| Path_33 | 23 | 19 |
| Path_34 | 13 | 29 |
| Path_35 | 41 | 42 |
| Path_36 | 65 | 32 |
| Path_37 | 64 | 14 |
| Path_38 | 45 | 63 |
| Path_39 | 59 | 30 |
| Path_40 | 9 | 41 |
| Path_41 | 51 | 35 |
| Path_42 | 58 | 37 |
| Path_43 | 15 | 11 |
| Path_44 | 35 | 4 |
| Path_45 | 67 | 15 |
| Path_46 | 24 | 47 |
| Path_47 | 46 | 17 |
| Path_48 | 18 | 48 |
| Path_49 | 71 | 27 |
| Path_50 | 50 | 62 |
| Path_51 | 19 | 25 |
| Path_52 | 44 | 33 |
| Path_53 | 14 | 26 |
| Path_54 | 60 | 46 |
| Path_55 | 28 | 3 |
| Path_56 | 72 | 28 |
| Path_57 | 21 | 43 |
| Path_58 | 33 | 61 |
| Path_59 | 49 | 21 |
| Path_60 | 63 | 24 |
| Path_61 | 34 | 58 |
| Path_62 | 29 | 16 |
| Path_63 | 37 | 20 |
| Path_64 | 40 | 52 |
| Path_65 | 32 | 50 |
| Path_66 | 61 | 12 |
| Path_67 | 27 | 45 |
| Path_68 | 76 | 8 |
| Path_69 | 26 | 31 |
| Path_70 | 69 | 34 |
| Path_71 | 55 | 36 |
| Path_72 | 17 | 2 |
| Path_73 | 42 | 23 |
| Path_74 | 68 | 22 |
| Path_75 | 70 | 9 |
| Path_76 | 52 | 13 |
| Path_77 | 4 | 1 |
| Path_78 | 1 | 79 |
| Path_79 | 2 | 38 |
| Path_80 | 7 | 6 |
| Path_81 | 12 | 69 |
| Path_82 | 5 | 40 |

B. Template-Based Search

| **Path** | **Node2Vec_Rank** | **TransE_Rank** |
| --- | --- | --- |
| Path_0 | 117 | 93 |
| Path_1 | 2 | 83 |
| Path_2 | 7 | 109 |
| Path_3 | 67 | 89 |
| Path_4 | 73 | 56 |
| Path_5 | 40 | 23 |
| Path_6 | 47 | 71 |
| Path_7 | 99 | 22 |
| Path_8 | 33 | 42 |
| Path_9 | 111 | 54 |
| Path_10 | 12 | 69 |
| Path_11 | 14 | 41 |
| Path_12 | 21 | 55 |
| Path_13 | 26 | 70 |
| Path_14 | 62 | 28 |
| Path_15 | 95 | 10 |
| Path_16 | 58 | 72 |
| Path_17 | 107 | 21 |
| Path_18 | 92 | 3 |
| Path_19 | 84 | 67 |
| Path_20 | 3 | 29 |
| Path_21 | 19 | 5 |
| Path_22 | 1 | 64 |
| Path_23 | 115 | 9 |
| Path_24 | 18 | 108 |
| Path_25 | 22 | 115 |
| Path_26 | 38 | 117 |
| Path_27 | 53 | 104 |
| Path_28 | 9 | 114 |
| Path_29 | 105 | 107 |
| Path_30 | 80 | 99 |
| Path_31 | 75 | 100 |
| Path_32 | 85 | 85 |
| Path_33 | 78 | 113 |
| Path_34 | 102 | 101 |
| Path_35 | 49 | 111 |
| Path_36 | 28 | 106 |
| Path_37 | 46 | 103 |
| Path_38 | 44 | 116 |
| Path_39 | 36 | 102 |
| Path_40 | 69 | 110 |
| Path_41 | 11 | 105 |
| Path_42 | 72 | 112 |
| Path_43 | 101 | 86 |
| Path_44 | 61 | 96 |
| Path_45 | 83 | 91 |
| Path_46 | 114 | 82 |
| Path_47 | 42 | 87 |
| Path_48 | 77 | 97 |
| Path_49 | 25 | 90 |
| Path_50 | 113 | 94 |
| Path_51 | 64 | 88 |
| Path_52 | 97 | 84 |
| Path_53 | 103 | 98 |
| Path_54 | 106 | 92 |
| Path_55 | 17 | 95 |
| Path_56 | 81 | 73 |
| Path_57 | 96 | 68 |
| Path_58 | 87 | 4 |
| Path_59 | 59 | 80 |
| Path_60 | 79 | 50 |
| Path_61 | 104 | 24 |
| Path_62 | 82 | 78 |
| Path_63 | 31 | 35 |
| Path_64 | 48 | 37 |
| Path_65 | 109 | 81 |
| Path_66 | 51 | 38 |
| Path_67 | 66 | 33 |
| Path_68 | 68 | 15 |
| Path_69 | 32 | 48 |
| Path_70 | 56 | 49 |
| Path_71 | 98 | 25 |
| Path_72 | 15 | 20 |
| Path_73 | 37 | 26 |
| Path_74 | 35 | 52 |
| Path_75 | 29 | 60 |
| Path_76 | 5 | 66 |
| Path_77 | 65 | 8 |
| Path_78 | 6 | 74 |
| Path_79 | 86 | 19 |
| Path_80 | 8 | 53 |
| Path_81 | 94 | 32 |
| Path_82 | 57 | 39 |
| Path_83 | 89 | 17 |
| Path_84 | 20 | 63 |
| Path_85 | 24 | 76 |
| Path_86 | 55 | 79 |
| Path_87 | 52 | 43 |
| Path_88 | 10 | 75 |
| Path_89 | 110 | 61 |
| Path_90 | 13 | 47 |
| Path_91 | 50 | 11 |
| Path_92 | 45 | 77 |
| Path_93 | 76 | 57 |
| Path_94 | 71 | 65 |
| Path_95 | 39 | 27 |
| Path_96 | 88 | 51 |
| Path_97 | 100 | 14 |
| Path_98 | 34 | 36 |
| Path_99 | 90 | 40 |
| Path_100 | 108 | 13 |
| Path_101 | 63 | 59 |
| Path_102 | 116 | 46 |
| Path_103 | 91 | 18 |
| Path_104 | 41 | 16 |
| Path_105 | 4 | 1 |
| Path_106 | 54 | 7 |
| Path_107 | 93 | 30 |
| Path_108 | 27 | 31 |
| Path_109 | 16 | 34 |
| Path_110 | 112 | 45 |
| Path_111 | 30 | 44 |
| Path_112 | 43 | 62 |
| Path_113 | 60 | 58 |
| Path_114 | 70 | 6 |
| Path_115 | 23 | 12 |
| Path_116 | 74 | 2 |

Table 2. The results of each microbe: disease pair for both an all shortest paths and a template-based search. Parameters are shown as undirected or directed for all shortest path results, or the template is given for each template-based search.

| Microbe: Disease Pair | Method | Parameters | Path Length | Total Paths |
| --- | --- | --- | --- | --- |
| eikenella: lower digestive tract Homo sapiens, inflammatory bowel disease | all shortest paths | undirected | 4 | 2 |
| eikenella: lower digestive tract Homo sapiens, inflammatory bowel disease | all shortest paths | directed | 7 | 20 |
| eikenella: lower digestive tract Homo sapiens, inflammatory bowel disease | template-based | microbe, gene, protein, metabolite, disease | 5 | 4 |
| eikenella: lower digestive tract Homo sapiens, inflammatory bowel disease | template-based | microbe, metabolite, protein, gene, disease | 5 | 0 |
| eikenella: lower digestive tract Homo sapiens, inflammatory bowel disease | template-based | microbe, gene, protein, protein, metabolite, disease | 6 | 0 |
| eikenella: lower digestive tract Homo sapiens, inflammatory bowel disease | template-based | microbe, gene, protein, metabolite, metabolite, disease | 6 | 3 |
| eikenella: lower digestive tract Homo sapiens, inflammatory bowel disease | template-based | microbe, gene, protein, protein, protein, metabolite, disease | 7 | 20 |
| eikenella: lower digestive tract Homo sapiens, inflammatory bowel disease | template-based | microbe, gene, protein, metabolite, protein, metabolite, disease | 7 | 18 |
| eubacterium rectale: lower digestive tract Homo sapiens, inflammatory bowel disease | all shortest paths | undirected | 4 | 1 |
| eubacterium rectale: lower digestive tract Homo sapiens, inflammatory bowel disease | all shortest paths | directed | 4 | 1 |
| eubacterium rectale: lower digestive tract Mus musculus, inflammatory bowel disease | all shortest paths | undirected | 5 | 40 |
| eubacterium rectale: lower digestive tract Mus musculus, inflammatory bowel disease | all shortest paths | directed | 7 | 9 |
| eubacterium rectale: lower digestive tract Homo sapiens, inflammatory bowel disease | template-based | microbe, gene, protein, metabolite, disease | 5 | 0 |
| eubacterium rectale: lower digestive tract Homo sapiens, inflammatory bowel disease | template-based | microbe, metabolite, protein, gene, disease | 5 | 0 |
| eubacterium rectale: lower digestive tract Homo sapiens, inflammatory bowel disease | template-based | microbe, gene, protein, protein, metabolite, disease | 6 | 0 |
| eubacterium rectale: lower digestive tract Homo sapiens, inflammatory bowel disease | template-based | microbe, gene, protein, metabolite, metabolite, disease | 6 | 0 |
| eubacterium rectale: lower digestive tract Homo sapiens, inflammatory bowel disease | template-based | microbe, gene, protein, protein, protein, metabolite, disease | 7 | 10 |
| eubacterium rectale: lower digestive tract Homo sapiens, inflammatory bowel disease | template-based | microbe, gene, protein, metabolite, protein, metabolite, disease | 7 | 7 |
| eubacterium rectale: lower digestive tract Mus musculus, inflammatory bowel disease | template-based | microbe, gene, protein, metabolite, disease | 5 | 0 |
| eubacterium rectale: lower digestive tract Mus musculus, inflammatory bowel disease | template-based | microbe, metabolite, protein, gene, disease | 5 | 0 |
| eubacterium rectale: lower digestive tract Mus musculus, inflammatory bowel disease | template-based | microbe, gene, protein, protein, metabolite, disease | 6 | 0 |
| eubacterium rectale: lower digestive tract Mus musculus, inflammatory bowel disease | template-based | microbe, gene, protein, metabolite, metabolite, disease | 6 | 0 |
| eubacterium rectale: lower digestive tract Mus musculus, inflammatory bowel disease | template-based | microbe, gene, protein, protein, protein, metabolite, disease | 7 | 0 |
| eubacterium rectale: lower digestive tract Mus musculus, inflammatory bowel disease | template-based | microbe, gene, protein, metabolite, protein, metabolite, disease | 7 | 0 |
| faecalibacterium prausnitzii: lower digestive tract Homo sapiens, Parkinson disease | all shortest paths | undirected | 4 | 56 |
| faecalibacterium prausnitzii: lower digestive tract Homo sapiens, Parkinson disease | all shortest paths | directed | 5 | 16 |
| faecalibacterium prausnitzii: lower digestive tract Mus musculus, Parkinson disease | all shortest paths | undirected | 4 | 1 |
| faecalibacterium prausnitzii: lower digestive tract Mus musculus, Parkinson disease | all shortest paths | directed | 5 | 10 |
| faecalibacterium prausnitzii: lower digestive tract Homo sapiens, Parkinson disease | template-based | microbe, gene, protein, metabolite, disease | 5 | 113 |
| faecalibacterium prausnitzii: lower digestive tract Homo sapiens, Parkinson disease | template-based | microbe, metabolite, protein, gene, disease | 5 | 3 |
| faecalibacterium prausnitzii: lower digestive tract Mus musculus, Parkinson disease | template-based | microbe, gene, protein, metabolite, disease | 5 | 0 |
| faecalibacterium prausnitzii: lower digestive tract Mus musculus, Parkinson disease | template-based | microbe, metabolite, protein, gene, disease | 5 | 1 |
| streptococcus: lower digestive tract Homo sapiens, inflammatory bowel disease | all shortest paths | undirected | 4 | 2 |
| streptococcus: lower digestive tract Homo sapiens, inflammatory bowel disease | all shortest paths | directed | 7 | 20 |
| streptococcus: lower digestive tract Homo sapiens, inflammatory bowel disease | template-based | microbe, gene, protein, metabolite, disease | 5 | 4 |
| streptococcus: lower digestive tract Homo sapiens, inflammatory bowel disease | template-based | microbe, metabolite, protein, gene, disease | 5 | 0 |
| streptococcus: lower digestive tract Homo sapiens, inflammatory bowel disease | template-based | microbe, gene, protein, protein, metabolite, disease | 6 | 0 |
| streptococcus: lower digestive tract Homo sapiens, inflammatory bowel disease | template-based | microbe, gene, protein, metabolite, metabolite, disease | 6 | 3 |
| streptococcus: lower digestive tract Homo sapiens, inflammatory bowel disease | template-based | microbe, gene, protein, protein, protein, metabolite, disease | 7 | 20 |
| streptococcus: lower digestive tract Homo sapiens, inflammatory bowel disease | template-based | microbe, gene, protein, metabolite, protein, metabolite, disease | 7 | 18 |

| 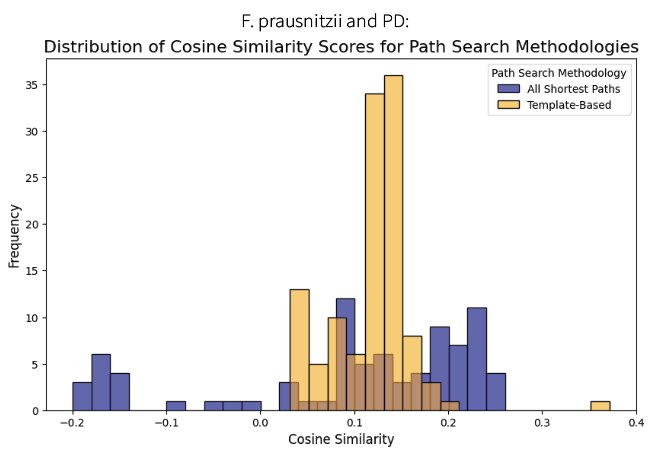  Supplementary Figure 1. Path prioritization results for searching all microbial first order neighbors of *Faecalibacterium prausnitzii* as the source and PD as the target. Cosine similarity values represent the average cosine similarity of all nodes to the target node for each path from embeddings generated using TransE. A Mann-Whitney U test revealed no significant difference in cosine similarity values between methods (p = 0.3), though template-based paths tended to have higher values. |
| --- |
